# Supplementary material
Source: publisher figshare collection journal article supplement (https://acs.figshare.com/ndownloader/files/14083799)
Supplement: Supplementary file 1 [file 14083799]

# High Power Density Tower-like Triboelectric Nanogenerator for Harvesting Arbitrary Directional Water Wave Energy

Minyi Xu<sup>†, ‡, ⊥</sup>, Tiancong Zhao<sup>†, ⊥</sup>, Chuan Wang<sup>†</sup>, Steven L. Zhang<sup>‡</sup>, Zhou Li<sup>§</sup>, Xinxiang Pan<sup>†, ⊥</sup>, and Zhong Lin Wang<sup>\*, ‡, §</sup>

<sup>†</sup> Marine Engineering College, Dalian Maritime University, Dalian, 116026, China

<sup>‡</sup> School of Materials Science and Engineering, Georgia Institute of Technology, Atlanta, Georgia 30332-0245, United States

<sup>§</sup> Beijing Institute of Nanoenergy and Nanosystems, Chinese Academy of Sciences, Beijing 100085, China

<sup>⊥</sup> Guangdong Ocean University, Zhanjiang, 524088, China

\*Address correspondence to zhong.wang@mse.gatech.edu

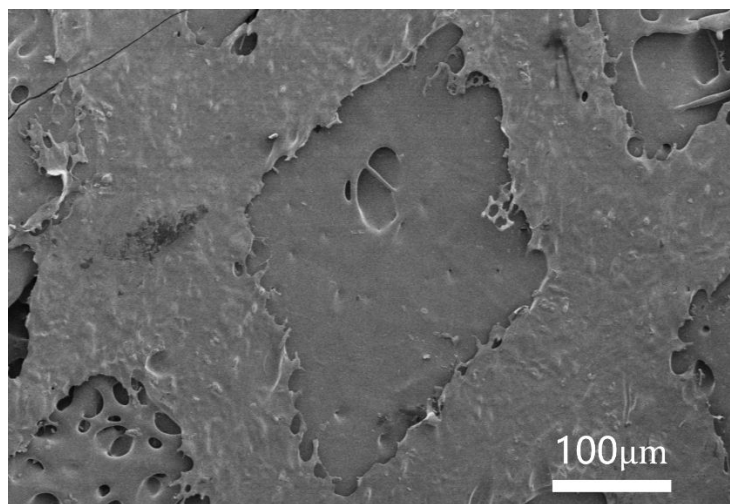

**Figure S1:** The SEM image of nylon film coated on the 3D printed arc surface.

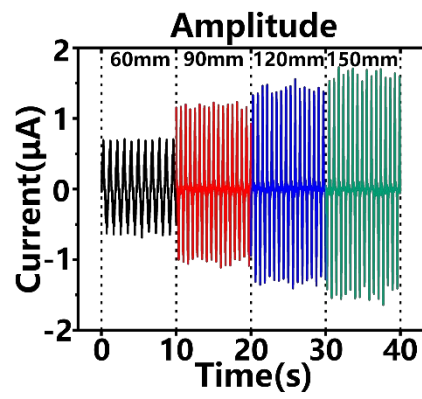

**Figure S2:** The short-circuit current of the TENG unit on the amplitude ranging from 60 mm to 150 mm at the constant frequency of 1.6 Hz.

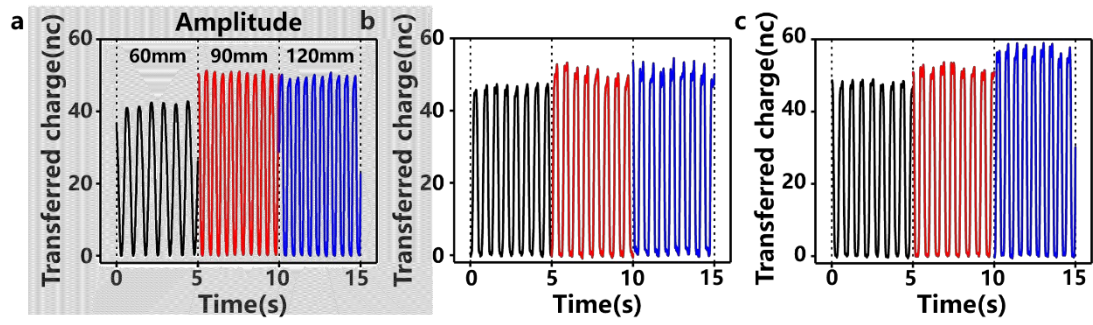

**Figure S3:** The transferred charge of the TENG unit with the tubular block diameter of (a)  $D = 94 \text{ mm}$ , (b)  $D = 104 \text{ mm}$ , and (c)  $D = 114 \text{ mm}$ .

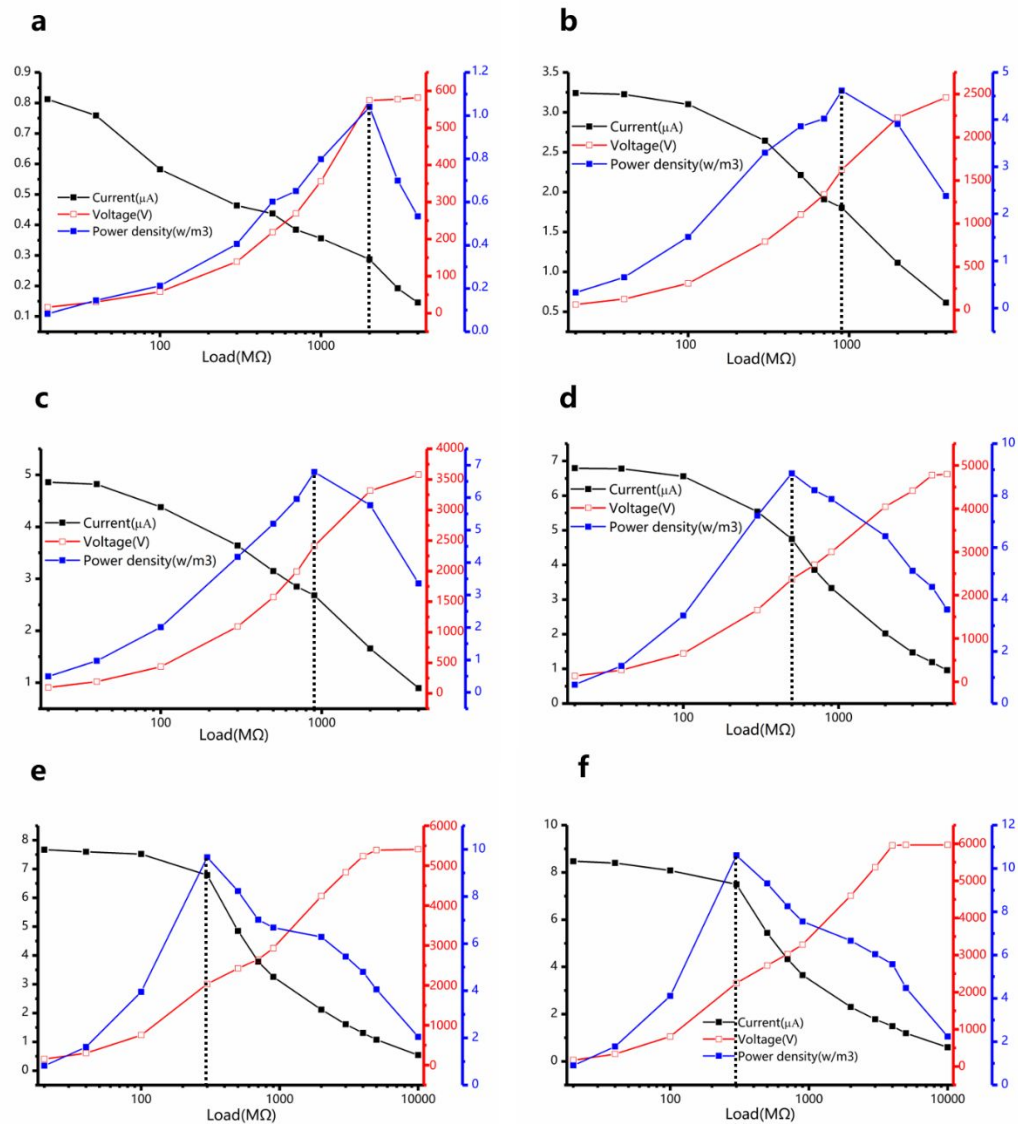

**Figure S4:** Dependence of the output voltage and current, and power density for T-ENG with (a) 1 units, (b) 4 units, (c) 6 units, (d) 8 units, (e) 9 units, and (f) 10 units on the resistance of the load.

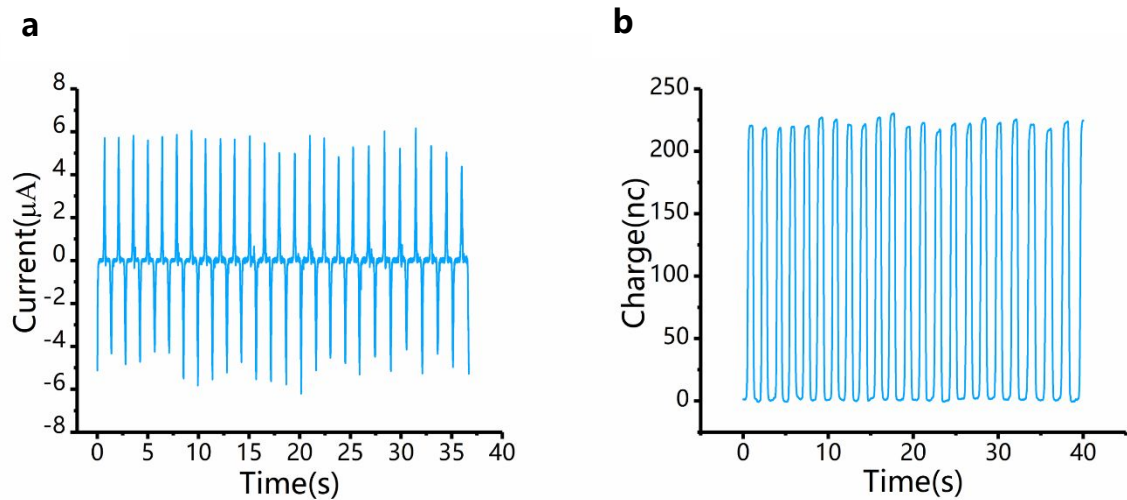

**Figure S5:** The output (a) current and (b) transferred charge of the T-TENG under wave excitation in a water wave tank.
